# Supplementary material for: Symbiotic polyamine metabolism regulates epithelial proliferation and macrophage differentiation in the colon
Source: PubMed Central journal article supplement (PMC8032791; doi:10.1038/s41467-021-22212-1), 2021-04-08
Supplement: 41467_2021_22212_MOESM1_ESM.pdf [file 41467_2021_22212_MOESM1_ESM.pdf]

## **Supplementary Information**

Symbiotic polyamine metabolism regulates epithelial proliferation and macrophage differentiation in the colon

Atsuo Nakamura et al.

- Supplementary Figures 1-9
- Supplementary Tables 1-2

# Supplementary figure 1

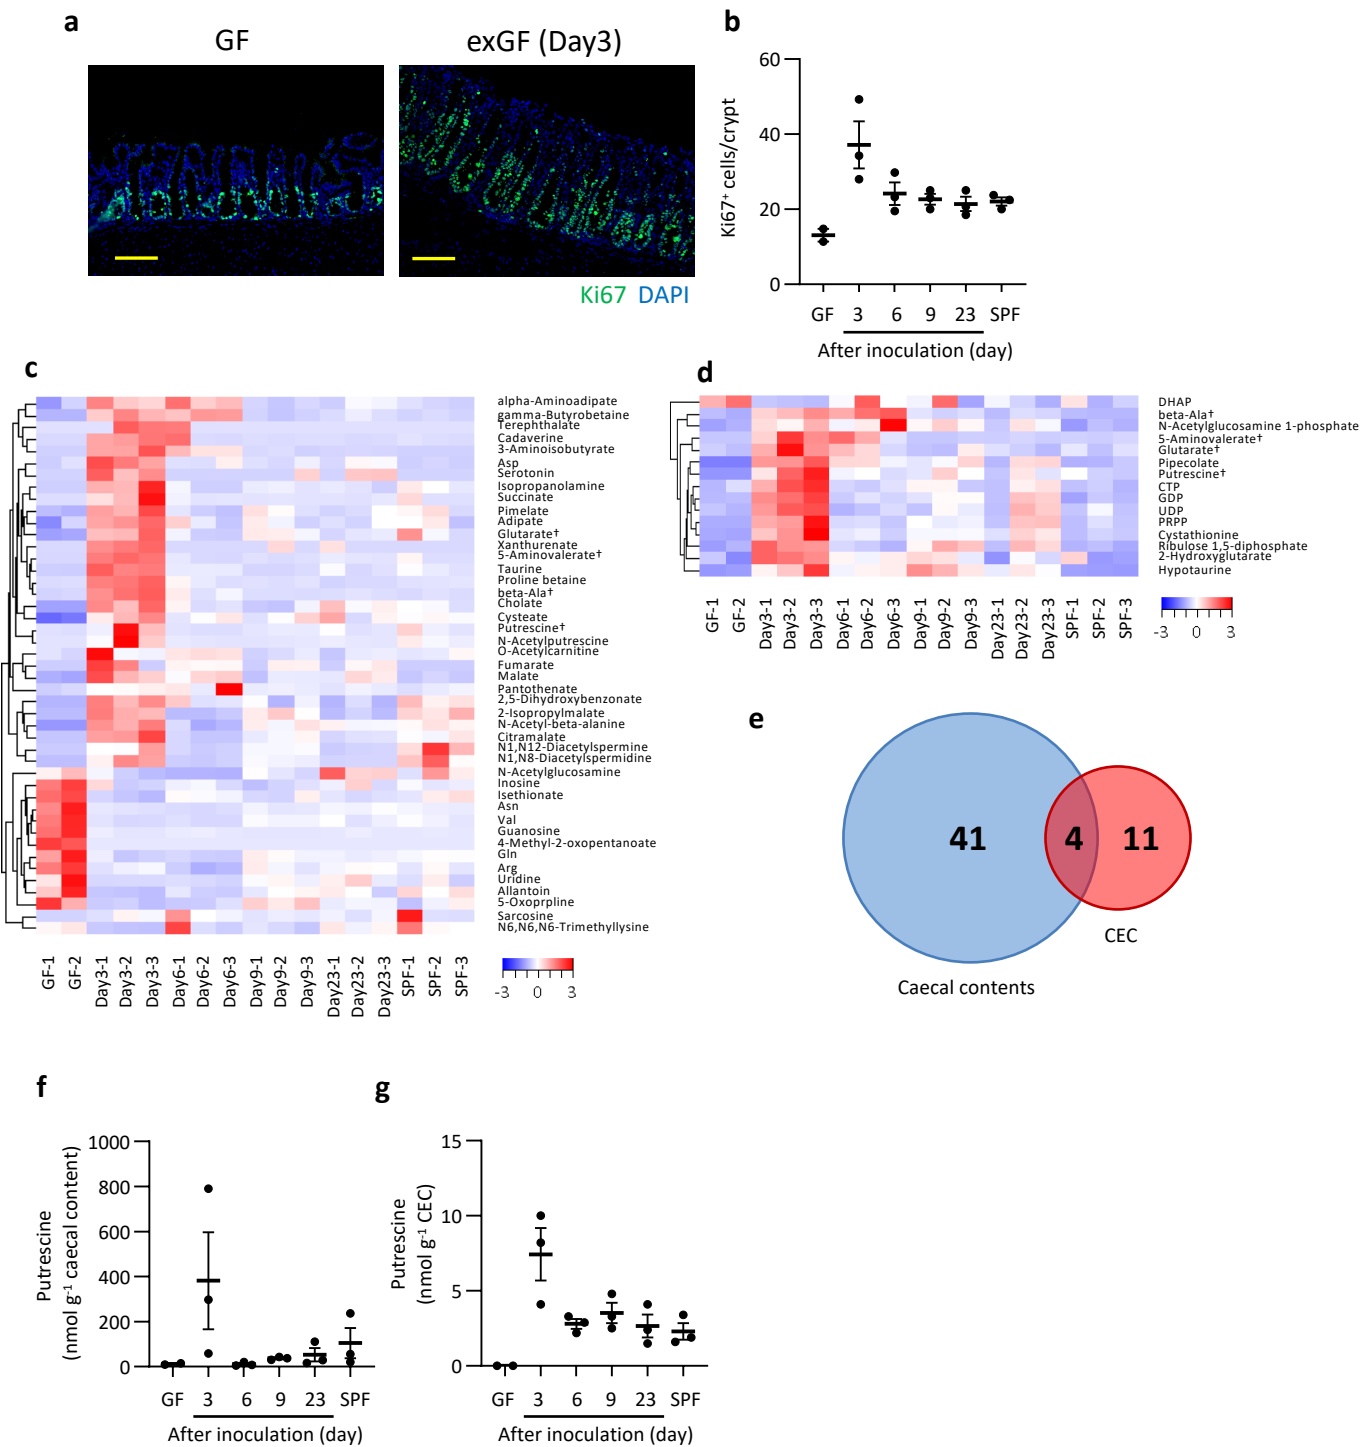

## Supplementary Fig. 1. CECs proliferation correlated with intracellular and luminal putrescine.

**a** Representative microscopic images of Ki67 immunostaining (green) in colonic tissues of GF, exGF and SPF mice. Nuclei are counterstained with DAPI (blue). Scale bar: 100  $\mu\text{m}$ . **b** Quantification of Ki67-positive cells/crypt per group (GF:  $n = 2$ , day 3–23 and SPF:  $n = 3$ , independent animals). **c, d** Heatmaps indicate the metabolites significantly correlated with the number of Ki67-positive cells in caecal contents (**c**) or colonic epithelial cells (**d**). Correlations were analyzed using the Spearman's rank correlation coefficient. **e** Venn diagram indicates the metabolites positively correlated with the number of Ki67-positive cells in caecal contents and CEC. †Metabolites commonly found in **c** and **d**. **f, g** Putrescine concentration in **f** caecal contents or **g** CECs of GF, exGF and SPF mice (GF:  $n = 2$ , day 3–23 and SPF:  $n = 3$ ). Data shown represent the mean  $\pm$  SEM.

# Supplementary figure 2

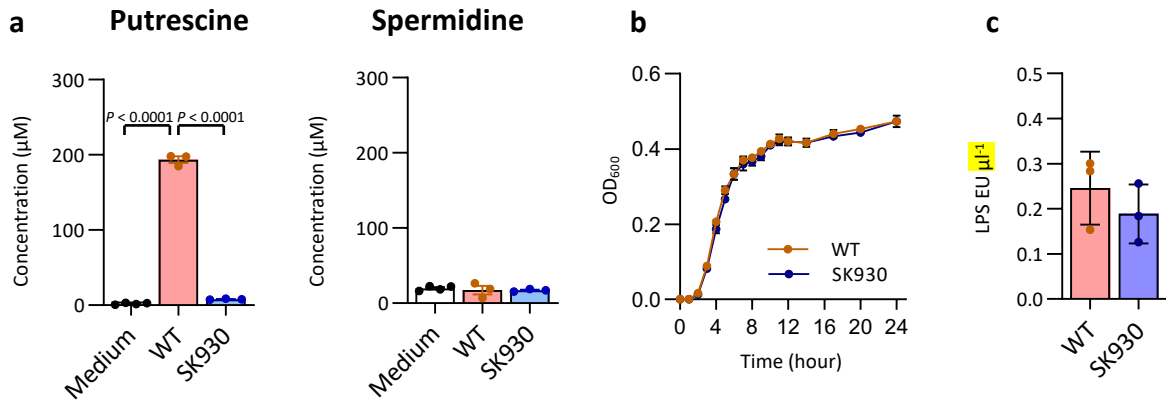

## Supplementary Fig. 2. Characteristics *E. coli* WT and SK930 strain.

**a** The putrescine and spermidine concentrations in of WT and SK930 culture supernatant (medium:  $n = 4$ , WT and SK930,  $n = 3$ ). **b** Growth curves of WT and SK930 strain ( $n = 3$ ).  $1 \times 10^2$  CFU  $\text{ml}^{-1}$  of each strain were added to the medium. After culturing for 24 hours, both bacterial numbers reached to  $1 \times 10^6$  CFU  $\text{ml}^{-1}$ . **c** Measuring the amount of LPS (at OD<sub>600</sub> = 0.5) of WT and SK930 strain ( $n = 3$ ). The individual data were obtained from independent cultures. All data shown represent the mean  $\pm$  SEM. Statistical significance was calculated using the one-way ANOVA followed by Tukey's post-hoc test (**a**) and the Welch's *t*-test (two-sided) (**c**).

# Supplementary figure 3

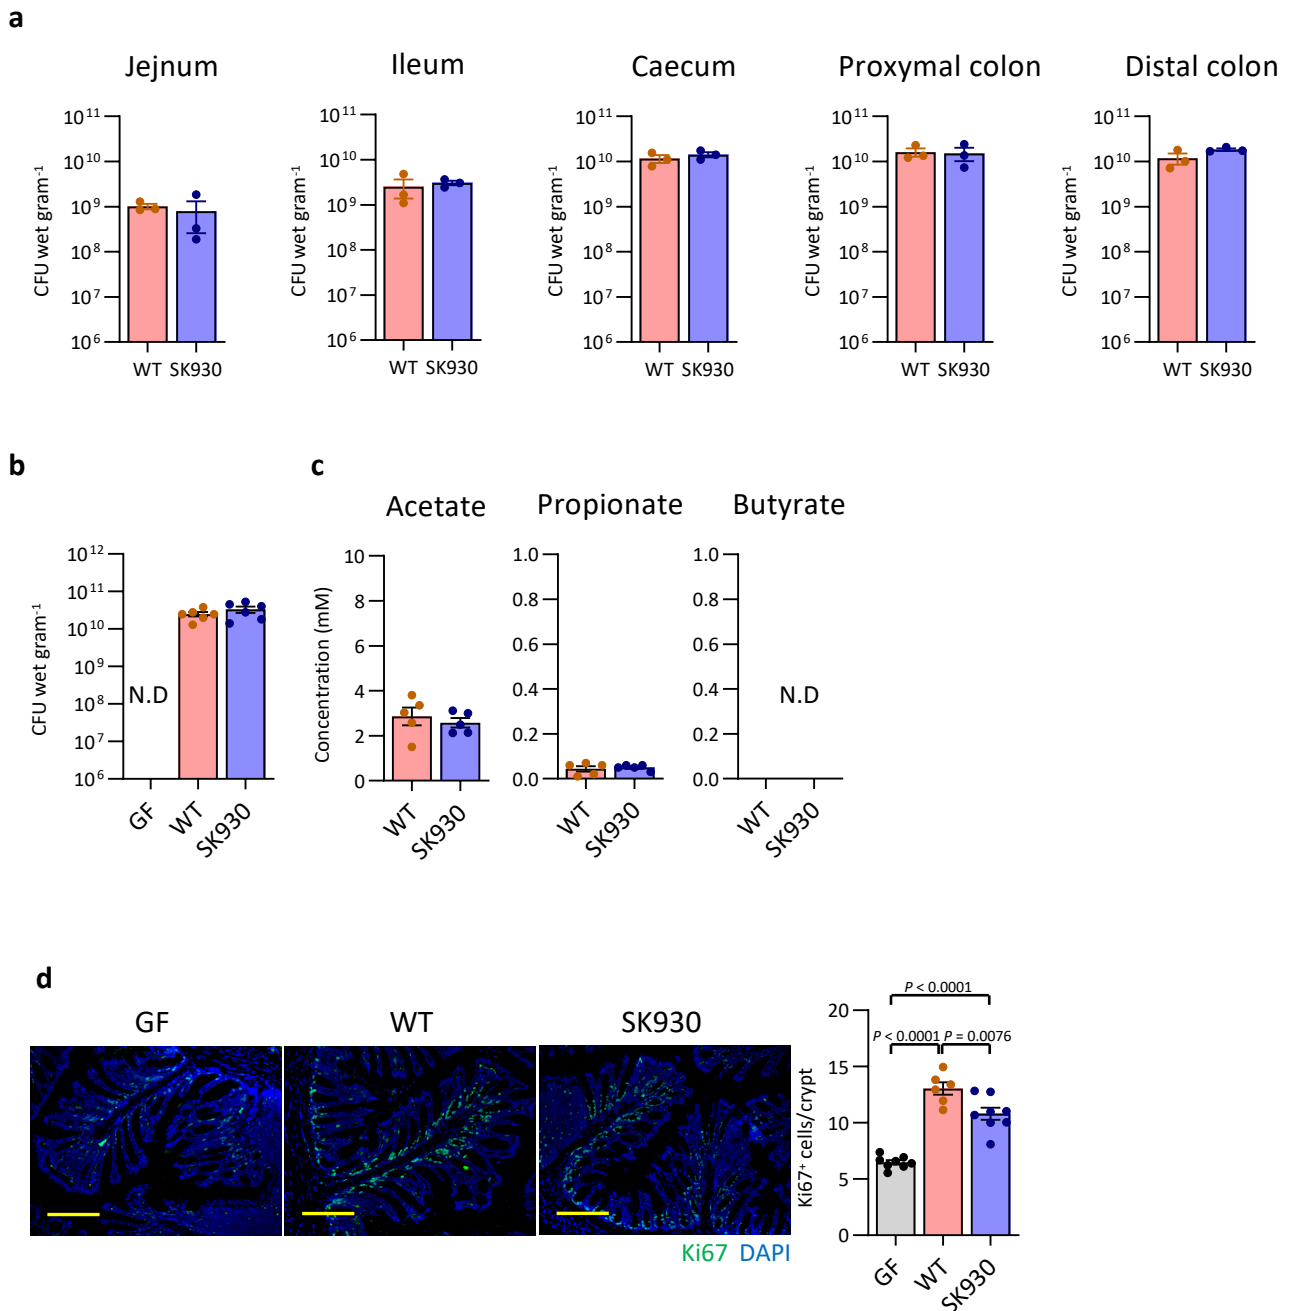

## Supplementary Fig. 3. Characterisation of F1 gnotobiotic mice with WT or SK930 strain.

**a** The number of *E. coli* in the luminal contents from the jejunum to the distal colon obtained from the WT-strain-associated and SK930-strain-associated mice ( $n = 3$ , independent animals). **b** Faecal bacterial numbers of GF, WT or SK930 strain-associated mice ( $n = 6$ ). **c** Faecal SCFA concentrations of WT and SK930 strain-associated mice ( $n = 5$ , independent animals). **d** Representative microscopic images of Ki67 immunostaining (green) in colonic tissue. Nuclei are counterstained with DAPI (blue). Scale bar: 100  $\mu\text{m}$  (GF:  $n = 8$ , WT:  $n = 6$ , SK930:  $n = 8$ , independent animals). All data shown represent the mean  $\pm$  SEM. Statistical significance was calculated using the Student's *t*-test (two-sided) (**a-c**), the one-way ANOVA followed by Tukey's post-hoc test (**d**). N.D. not detected.



# Supplementary figure 4

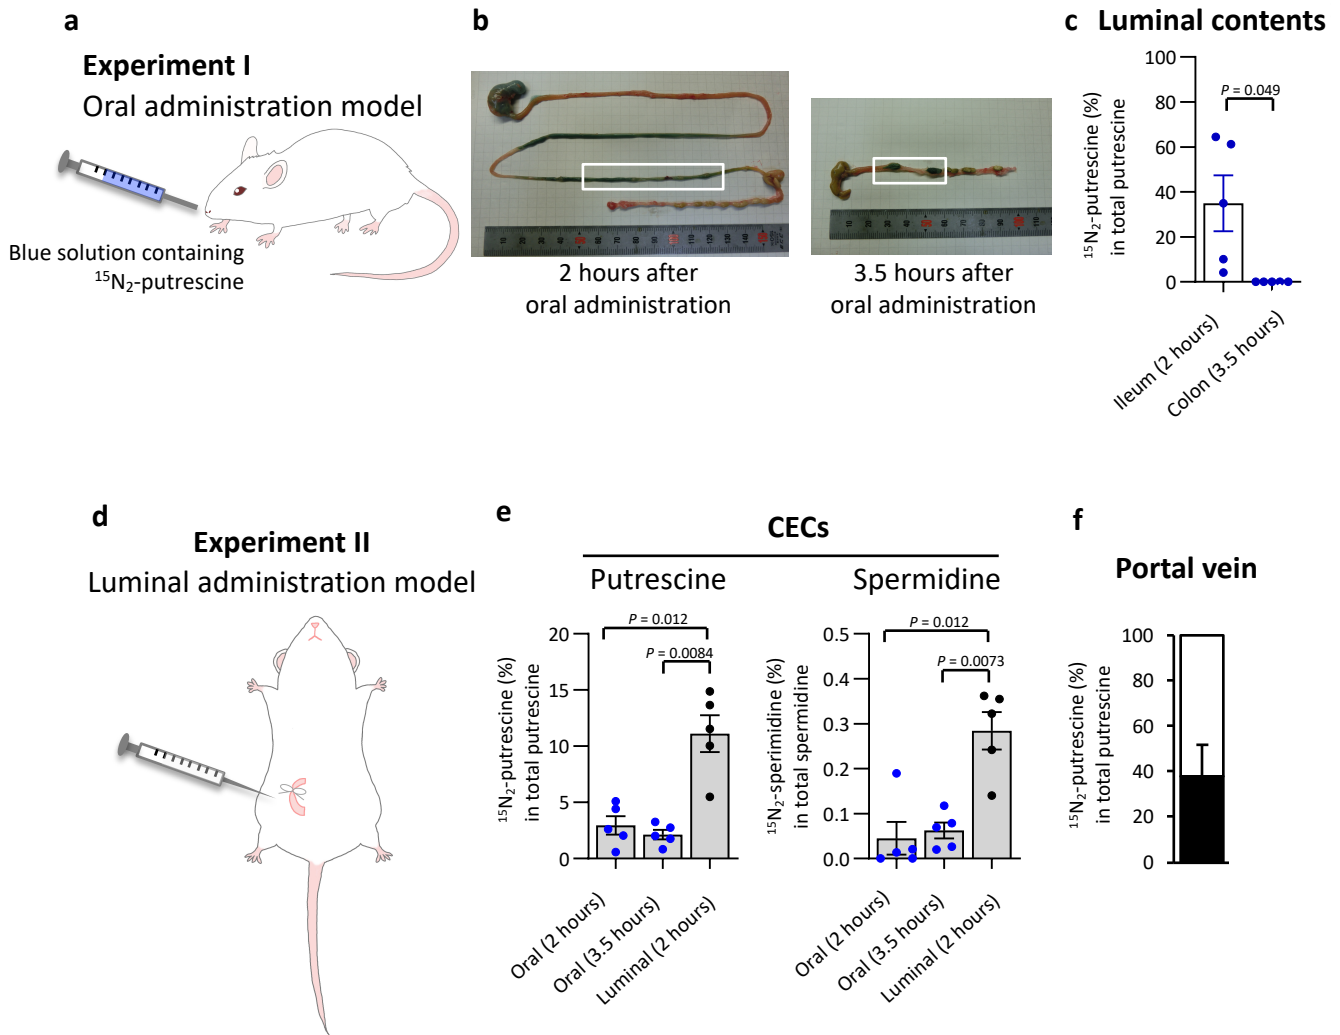

**Supplementary Fig. 4. Comparison of uptake between dietary and colonic luminal polyamine into the host. Experiment I:** **a** SPF mice were orally administered 200  $\mu$ M stable-isotope labeled  $^{15}\text{N}_2$ -putrescine in D-PBS containing food coloring blue agent (200  $\mu$ l). **b** White squares represent the intestinal regions analysed for the detection of polyamine. The luminal contents of these regions are blue. The lower part of the ileum 2 hours after oral administration (left panel,  $n = 5$ ) and colon 3.5 hours after oral administration (right panel). **c** Isotope ratio of polyamines in the luminal contents (2 hours and 3.5 hours after oral administration). ( $n = 5$ , independent animals). **Experiment II:** **d** SPF mice were injected 200  $\mu$ M isotope-labeled  $^{15}\text{N}_2$ -putrescine (200  $\mu$ l) into the colonic lumen to assess the uptake of luminal putrescine into the CECs. Two hours post-injection, the isotope ratio of polyamines in the CECs was determined and compared with those in the CECs collected at 2 hours (the solution reached the lower small intestine) and 3.5 hours (the solution reached the colon) after oral administration in experiment I. **e** Isotope ratio of polyamines in CECs ( $n = 5$ , independent animals). **f** Proportion of stable-isotope labeled  $^{15}\text{N}_2$ -putrescine in portal vein (2 hours after luminal administration model) The black bar indicates the percent of  $^{15}\text{N}_2$  putrescine enrichment in total putrescine ( $n = 5$ , independent animals). All data shown represent the mean  $\pm$  SEM. Statistical significance was calculated using the Welch's  $t$ -test (two-sided) (c) and the Welch's ANOVA followed by Dunnett's T3 method (e).

# Supplementary figure 5

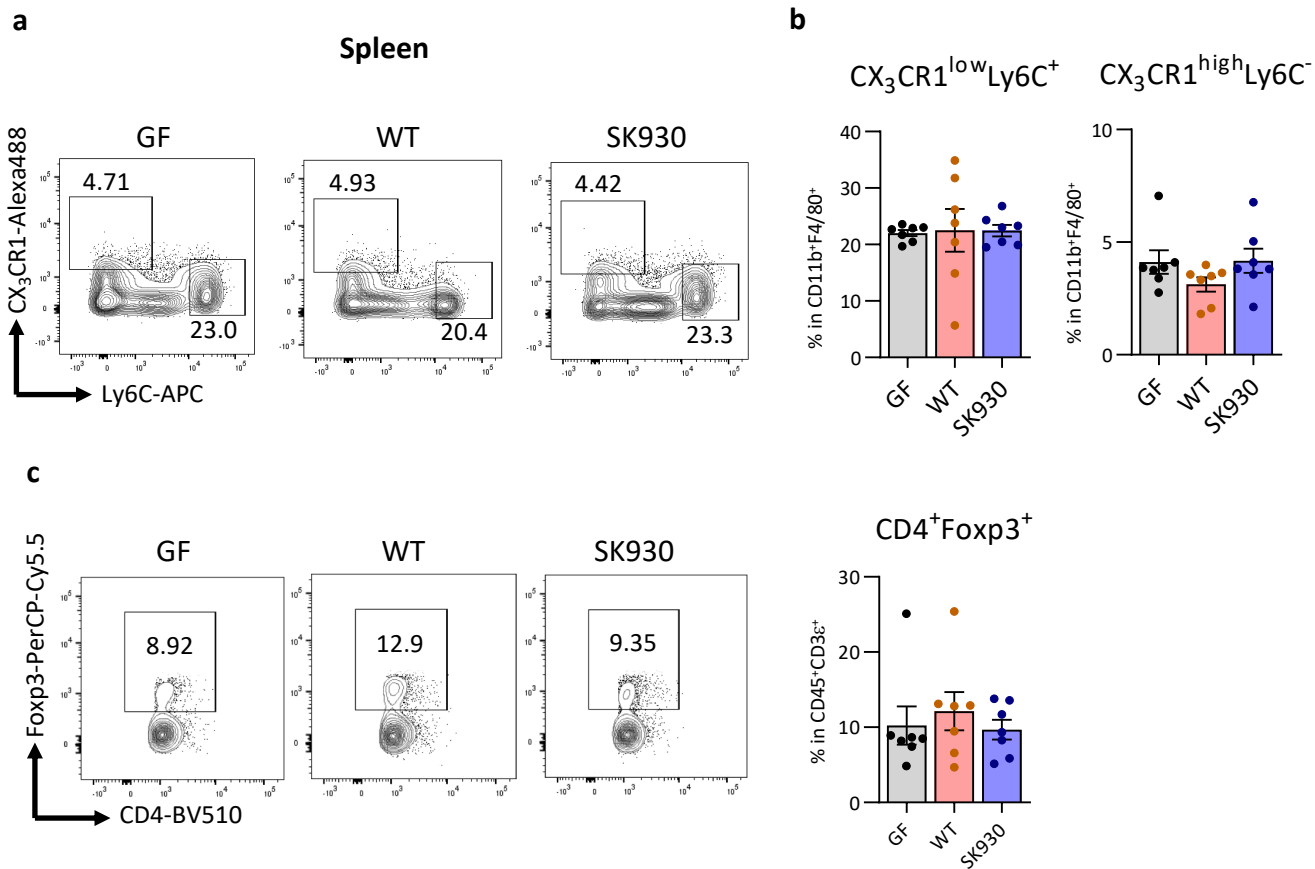

**Supplementary Fig. 5. Splenic macrophage subsets and CD4<sup>+</sup>Foxp3<sup>+</sup> cells in cLP of gnotobiotic mice under physiological conditions.** **a**, **b** Representative flow cytometry images and frequency of CX<sub>3</sub>CR1<sup>high</sup>Ly6C<sup>-</sup> macrophage and CX<sub>3</sub>CR1<sup>low</sup>Ly6C<sup>+</sup> in live CD45<sup>+</sup> CD11b<sup>+</sup> F4/80<sup>+</sup> splenic cells of GF, WT or SK930 strain-associated mice (n = 7, independent animals). **c** Representative flow cytometry images and frequency of CD4<sup>+</sup>Foxp3<sup>+</sup> cells in live CD45<sup>+</sup> CD3ε<sup>+</sup> cells in cLP of GF, WT- or SK930-strain-associated mice (n = 7, independent animals). Data shown represent the mean ± SEM. Statistical significance was calculated using the Welch's ANOVA followed by Dunnett's T3 post-hoc test (**b**, **c**).

# Supplementary figure 6

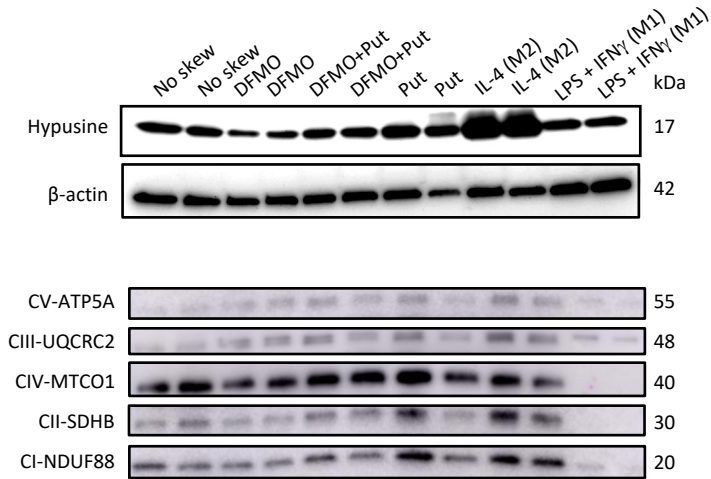

**Supplementary Fig. 6. Effects of polyamines on the hyp-eIF5A level and respiration of BMDMs.** BMDMs were cultured with macrophage colony-stimulating factor in the presence or absence of DFMO (1mM) and putrescine (100  $\mu$ M) for 3 day. IL-4 was added for M2-skewing condition (20 ng/ml), and LPS and IFN- $\gamma$  was added for M1-skewing condition (1  $\mu$ g/ml and 1 ng/ml). The images were western blot analysis of hyp-eIF5A and OXPHOS complexes I-V. These data were obtained from one independent experiment.

# Supplementary figure 7

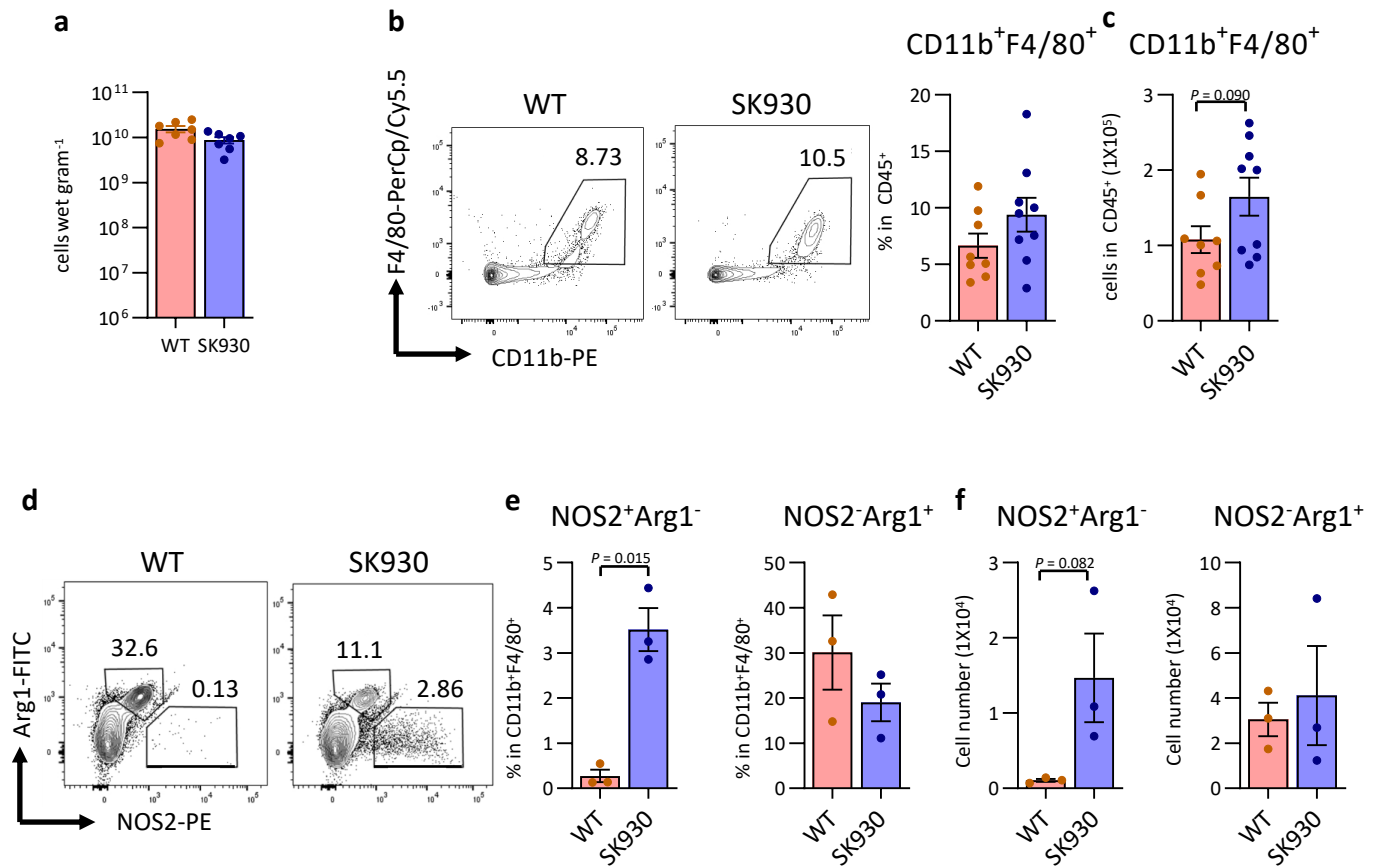

**Supplementary Fig. 7. Flow cytometry analysis of macrophage in mice with DSS-induced colitis.** **a** The number of *E. coli* in colonic contents of mice during DSS-induced colitis by quantitative PCR using *E. coli* specific primer (n = 7, independent animals) **b, c** Representative flow cytometry images, frequency and number of F4/80 positive cells in cLP of WT or SK930 strain-associated mice (WT: n = 8, SK930: n = 9, independent animals). **d–f** Representative flow cytometry images, frequency and numbers of NOS2<sup>+</sup>Arg1<sup>-</sup> or NOS2<sup>-</sup>Arg1<sup>+</sup> macrophage in CD45<sup>+</sup>CD11b<sup>+</sup>F4/80<sup>+</sup> population in cLP of WT or SK930 strain-associated mice (n = 3, independent animals). All data shown represent the mean ± SEM. Statistical significance was calculated using the Student's *t*-test (**c, f**) (two-sided) and the Welch's *t*-test (two-sided) (**e**).

# Supplementary figure 8

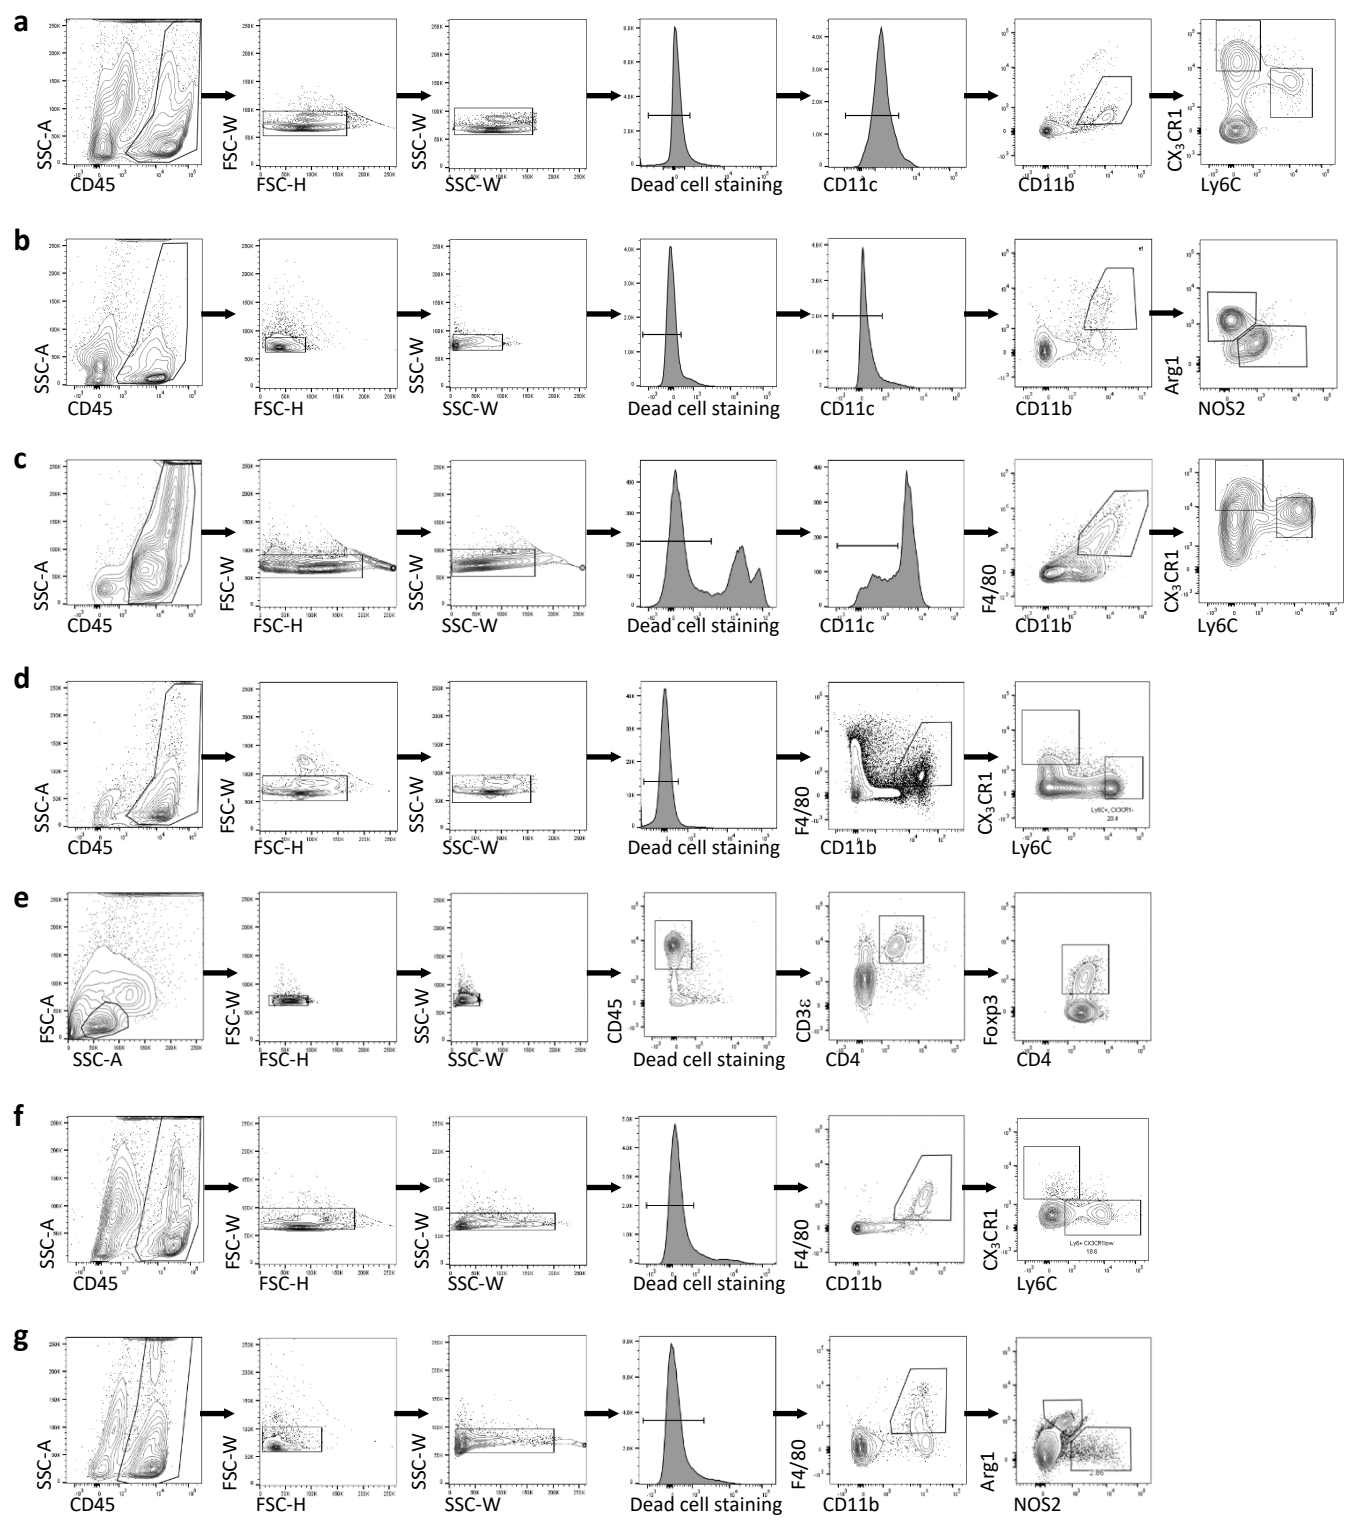

**Supplementary Fig. 2. Gating strategies used for flow cytometry analysis.**

**a** Gating strategy for CX<sub>3</sub>CR1<sup>high</sup>Ly6C<sup>-</sup> or CX<sub>3</sub>CR1<sup>low</sup>Ly6C<sup>+</sup> cells in CD11c<sup>-</sup>CD11b<sup>+</sup>F4/80<sup>+</sup> from cLP of mice presented on Fig. 3a. **b** Gating strategy for NOS2<sup>-</sup>Arg1<sup>+</sup> cells or NOS2<sup>+</sup>Arg1<sup>-</sup> in CD11c<sup>-</sup>CD11b<sup>+</sup>F4/80<sup>+</sup> cells from cLP of mice presented on Fig. 3d. **c** Gating strategy for CX<sub>3</sub>CR1<sup>high</sup>Ly6C<sup>-</sup> or CX<sub>3</sub>CR1<sup>low</sup>Ly6C<sup>+</sup> cells in CD11c<sup>-</sup>CD11b<sup>+</sup>F4/80<sup>+</sup> from BMDM cultures presented on Fig. 3h. **d** Gating strategy for CX<sub>3</sub>CR1<sup>high</sup>Ly6C<sup>-</sup> or CX<sub>3</sub>CR1<sup>low</sup>Ly6C<sup>+</sup> cells in CD11b<sup>+</sup>F4/80<sup>+</sup> from spleen presented on Supplementary Fig. 5a. **e** CD4<sup>+</sup>Foxp3<sup>+</sup> cells in CD3ε<sup>+</sup> from cLP of mice presented on Supplementary Fig. 5c. **f** Gating strategy for CX<sub>3</sub>CR1<sup>high</sup>Ly6C<sup>-</sup> or CX<sub>3</sub>CR1<sup>low</sup>Ly6C<sup>+</sup> cells in CD11b<sup>+</sup>F4/80<sup>+</sup> from cLP of mice with DSS-induced colitis presented on Supplementary Fig. 5g and 7b. **g** Gating strategy for NOS2<sup>-</sup>Arg1<sup>+</sup> cells or NOS2<sup>+</sup>Arg1<sup>-</sup> in CD11b<sup>+</sup>F4/80<sup>+</sup> cells from cLP of mice with DSS-induced colitis presented on Supplementary Fig. 7d.

**Supplementary Table 1. Metabolome analysis of cecal contents in WT- and SK930-strain-associated mice**

| Metabolite                         | Concentration ( $\mu\text{M}$ ) |         |         |         |         |         |         |        |         |        | WT / SK930 | WT vs. SK930 |
|------------------------------------|---------------------------------|---------|---------|---------|---------|---------|---------|--------|---------|--------|------------|--------------|
|                                    | WT                              |         |         | SK      |         |         | WT      |        | SK      |        |            |              |
|                                    | WT-1                            | WT-2    | WT-3    | SK-1    | SK-2    | SK-3    | Mean    | S.D.   | Mean    | S.D.   |            |              |
| Putrescine                         | 139.87                          | 175.27  | 170.82  | 9.83    | 6.05    | 7.89    | 161.99  | 19.28  | 7.92    | 1.89   | 20.44      | 0.13         |
| Creatinine                         | 514.84                          | 411.69  | 596.75  | 219.06  | 120.70  | 150.37  | 507.76  | 92.74  | 163.38  | 50.45  | 3.11       | 0.13         |
| S-Adenosylmethionine               | 18.44                           | 19.98   | 20.31   | 11.61   | 8.17    | 12.42   | 19.58   | 0.99   | 10.73   | 2.25   | 1.82       | 0.13         |
| Gly                                | 1461.85                         | 1010.23 | 1127.21 | 750.90  | 583.98  | 683.40  | 1199.76 | 234.39 | 672.76  | 83.97  | 1.78       | 0.37         |
| 3-Hydroxybutyric acid              | 143.28                          | 328.26  | 259.19  | 98.80   | 54.43   | N.D.    | 243.58  | 93.47  | 76.62   | 31.37  | 3.18       | 0.37         |
| His                                | 369.79                          | 256.04  | 232.97  | 175.91  | 134.40  | 161.37  | 286.27  | 73.24  | 157.22  | 21.06  | 1.82       | 0.37         |
| Lactic acid                        | 1238.05                         | 884.21  | 704.82  | 543.35  | 440.58  | 401.97  | 942.36  | 271.33 | 461.97  | 73.07  | 2.04       | 0.37         |
| Choline                            | 1572.20                         | 2762.94 | 1900.30 | 1057.95 | 841.40  | 841.40  | 2078.48 | 615.04 | 913.58  | 125.02 | 2.28       | 0.37         |
| Asn                                | 70.66                           | 42.16   | 37.17   | 32.06   | 18.16   | 17.04   | 50.00   | 18.07  | 22.42   | 8.37   | 2.23       | 0.37         |
| Gluconic acid                      | 68.96                           | 106.96  | 188.51  | 222.65  | 240.47  | 168.19  | 121.48  | 61.08  | 210.44  | 37.65  | 0.58       | 0.37         |
| Citrulline                         | 17.66                           | 9.46    | 13.57   | 8.99    | 6.55    | 7.43    | 13.56   | 4.10   | 7.66    | 1.24   | 1.77       | 0.37         |
| Ser                                | 237.56                          | 155.53  | 126.56  | 105.34  | 85.24   | 85.32   | 173.22  | 57.58  | 91.97   | 11.58  | 1.88       | 0.37         |
| Val                                | 1409.66                         | 953.79  | 763.81  | 733.02  | 499.01  | 546.99  | 1042.42 | 331.92 | 593.00  | 123.60 | 1.76       | 0.37         |
| Ornithine                          | 27.89                           | 11.23   | 27.78   | 10.89   | 7.33    | 15.19   | 22.30   | 9.59   | 11.14   | 3.93   | 2.00       | 0.37         |
| Thr                                | 126.06                          | 50.71   | 51.13   | 43.30   | 21.26   | 24.07   | 75.97   | 43.38  | 29.54   | 12.00  | 2.57       | 0.37         |
| Betaine aldehyde_+H <sub>2</sub> O | 20.39                           | 43.62   | 34.49   | 22.23   | 17.27   | 21.27   | 32.84   | 11.70  | 20.26   | 2.63   | 1.62       | 0.37         |
| Ala                                | 1805.12                         | 895.29  | 739.60  | 736.46  | 410.71  | 474.24  | 1146.67 | 575.52 | 540.47  | 172.67 | 2.12       | 0.37         |
| Ile                                | 980.47                          | 584.01  | 448.08  | 498.10  | 324.13  | 327.92  | 670.85  | 276.62 | 383.38  | 99.37  | 1.75       | 0.37         |
| Tyr                                | 640.93                          | 290.98  | 258.75  | 231.52  | 136.45  | 167.77  | 396.89  | 211.96 | 178.58  | 48.45  | 2.22       | 0.37         |
| Leu                                | 1880.37                         | 819.40  | 648.25  | 653.96  | 325.63  | 337.88  | 1116.01 | 667.47 | 439.16  | 186.13 | 2.54       | 0.37         |
| Creatine                           | 692.35                          | 553.77  | 964.38  | 614.92  | 489.14  | 483.05  | 736.83  | 208.89 | 529.04  | 74.44  | 1.39       | 0.37         |
| Phe                                | 834.97                          | 345.02  | 297.17  | 288.14  | 145.38  | 159.17  | 492.38  | 297.65 | 197.56  | 78.75  | 2.49       | 0.37         |
| Citric acid                        | 174.77                          | 141.70  | 167.35  | 147.42  | 142.66  | 142.88  | 161.27  | 17.35  | 144.32  | 2.68   | 1.12       | 0.37         |
| Lys                                | 1464.27                         | 654.17  | 735.99  | 648.26  | 426.57  | 523.43  | 951.47  | 445.97 | 532.75  | 111.13 | 1.79       | 0.37         |
| Asp                                | 114.11                          | 38.70   | 53.01   | 48.98   | 23.51   | 29.25   | 68.61   | 40.05  | 33.91   | 13.36  | 2.02       | 0.37         |
| Met                                | 543.43                          | 197.25  | 154.40  | 173.24  | 88.02   | 93.51   | 298.36  | 213.31 | 118.25  | 47.70  | 2.52       | 0.37         |
| Arg                                | 1573.97                         | 509.46  | 806.70  | 612.58  | 372.21  | 515.20  | 963.37  | 549.28 | 500.00  | 120.90 | 1.93       | 0.37         |
| Gln                                | 675.92                          | 169.54  | 170.76  | 184.07  | 29.31   | 67.30   | 338.74  | 292.00 | 93.56   | 80.65  | 3.62       | 0.37         |
| Pro                                | 1783.05                         | 1601.69 | 2713.40 | 1443.37 | 1232.06 | 1981.78 | 2032.71 | 596.43 | 1552.41 | 386.57 | 1.31       | 0.39         |
| Trp                                | 37.47                           | 9.51    | 9.16    | 10.50   | 4.04    | 5.46    | 18.71   | 16.24  | 6.67    | 3.40   | 2.81       | 0.39         |
| Glu                                | 2853.49                         | 1615.94 | 2037.91 | 2082.92 | 1113.68 | 2005.29 | 2169.11 | 629.12 | 1733.96 | 538.58 | 1.25       | 0.47         |
| Succinic acid                      | 1360.37                         | 1507.97 | 345.51  | 1107.22 | 132.18  | 736.74  | 1071.28 | 632.86 | 658.71  | 492.18 | 1.63       | 0.47         |
| Cys                                | 25.36                           | 9.80    | 6.95    | 10.92   | 9.16    | 7.14    | 14.04   | 9.91   | 9.07    | 1.89   | 1.55       | 0.51         |
| Uridine                            | 39.14                           | 42.43   | 49.23   | 41.42   | 43.63   | 54.00   | 43.60   | 5.15   | 46.35   | 6.71   | 0.94       | 0.62         |
| GABA                               | 11.93                           | 9.19    | 20.95   | 13.67   | 10.97   | 15.14   | 14.02   | 6.15   | 13.26   | 2.11   | 1.06       | 0.86         |
| Hydroxyproline                     | 9.02                            | 6.54    | 15.98   | 7.62    | N.D.    | 6.06    | 10.51   | 4.89   | -       | -      | -          | -            |
| Spermine                           | 11.77                           | 14.52   | 16.27   | 14.58   | N.D.    | 17.35   | 14.19   | 2.27   | -       | -      | -          | -            |
| Spermidine                         | 55.79                           | 45.38   | 47.63   | 8.22    | N.D.    | N.D.    | 49.60   | 5.48   | -       | -      | -          | -            |

N.D: not detected.

**Supplementary Table 2. Primer sequence for quantitative PCR**

| Gene     | Primer sequence |                                 |
|----------|-----------------|---------------------------------|
| 18S rRNA | forward         | 5' - GGACCAGAGCGAAAGCATTG - 3'  |
|          | reverse         | 5' - TTGCCAGTCGGCATCGTTTAT - 3' |
| Mki67    | forward         | 5' - AATCCAACCAAGTAAACGGGG - 3' |
|          | reverse         | 5' - TTGGCTTGCTTCATCCTCA - 3'   |
